# Supplementary material for: All-viral tracing of monosynaptic inputs to single birthdate-defined neurons in the intact brain
Source: bioRxiv or medRxiv preprint supplement (doi:10.1101/2021.10.18.464781), 2021-10-19
Supplement: Supplementary file [file media-1.pdf]

| REAGENT or RESOURCE                           | SOURCE                                                                     | IDENTIFIER                                                                                        |
|-----------------------------------------------|----------------------------------------------------------------------------|---------------------------------------------------------------------------------------------------|
| <b>Antibodies</b>                             |                                                                            |                                                                                                   |
| Anti-HA, rabbit                               | Cell Signaling Technology                                                  | Cat#3724                                                                                          |
| Anti-2A, rabbit                               | Merck                                                                      | Cat#ABS31                                                                                         |
| Anti-rabbit, AF647                            | Invitrogen                                                                 | Cat#A31573                                                                                        |
| Anti-rabbit, HRP                              | Invitrogen                                                                 | Cat#G-21234                                                                                       |
| Anti-HRP, Cy5                                 | Akoya Biosciences                                                          | Cat#NEL745001KT                                                                                   |
| Anti-RFP, rat                                 | ChromoTek                                                                  | Cat#5f8                                                                                           |
| Anti-rat, AF555                               | Abcam                                                                      | Cat#ab150166                                                                                      |
| Anti-rat, AF594                               | Invitrogen                                                                 | Cat#A-21209                                                                                       |
| Anti-GFP, chicken                             | Abcam                                                                      | Cat#ab13970                                                                                       |
| Anti-chicken, AF488                           | Invitrogen                                                                 | Cat#A11039                                                                                        |
| <b>Bacterial and virus strains</b>            |                                                                            |                                                                                                   |
| AAV1.CamKII0.4.Cre.SV40 (AAV-CKII-Cre)        | UPenn Vector Core                                                          | Cat#AV-1-PV2396                                                                                   |
| AAV-hS-FLEX-TVA-HA-N2cG                       | This paper / Viral Vector Core at Kavli Institute for Systems Neuroscience | N/A                                                                                               |
| EnvA-ΔG-CVS-N2c RV-tdTomato (RABV-tdTomato)   | As above                                                                   | N/A                                                                                               |
| EnvA-ΔG-CVS-N2c RV-ChR2-YFP (RABV-ChR2-YFP)   | As above                                                                   | N/A                                                                                               |
| EnvA-ΔG-CVS-N2c RV-GCaMP6f (RABV-GCaMP6f)     | As above                                                                   | N/A                                                                                               |
| AAV1.CAG.Flex.tdTomato.WPRE.bGH               | UPenn Vector Core                                                          | Cat#AV-1-ALL864                                                                                   |
| AAV1.Syn.GCaMP6m.WPRE.SV40                    | UPenn Vector Core                                                          | Cat#AV-1-PV2823                                                                                   |
| <b>Deposited data</b>                         |                                                                            |                                                                                                   |
| <i>In vivo</i> electrophysiology data         | This paper                                                                 | Will be added upon publication                                                                    |
| <b>Experimental models: cell lines</b>        |                                                                            |                                                                                                   |
| Neuro2A-CVS-N2c(G)                            | Jessell lab (Reardon <i>et al.</i> , 2016)                                 | N/A                                                                                               |
| Neuro2A-EnvA                                  | Jessell lab (Reardon <i>et al.</i> , 2016)                                 | N/A                                                                                               |
| Neuro2A                                       | American Type Culture Collection (ATCC)                                    | CCL-131                                                                                           |
| HEK293-TVA800                                 | Callaway lab (Osakada and Callaway, 2013)                                  | N/A                                                                                               |
| <b>Experimental models: Organisms/strains</b> |                                                                            |                                                                                                   |
| Mice: C57BL/6JBomTac                          | Taconic                                                                    | Cat#B6JBOM;<br>RRID:<br>IMSR_TAC:b6jbom                                                           |
| <b>Recombinant DNA</b>                        |                                                                            |                                                                                                   |
| pAAV-hSyn-FLEX-splitTVA-2A-2xHA-2A-CVS-N2cG   | This paper / Viral Vector Core at Kavli Institute for Systems Neuroscience | N/A                                                                                               |
| <b>Software and algorithms</b>                |                                                                            |                                                                                                   |
| KlustaKwik                                    | Kadir, Goodman and Harris, 2014; Rossant <i>et al.</i> , 2016              | <a href="https://github.com/klusta-team/klustakwik">https://github.com/klusta-team/klustakwik</a> |
| Python                                        | Python Software Foundation                                                 | <a href="https://www.python.org/">https://www.python.org/</a>                                     |

|                |                                 |                                                                                                           |
|----------------|---------------------------------|-----------------------------------------------------------------------------------------------------------|
| Datajoint      | Yatsenko <i>et al.</i> , 2015   | <a href="https://github.com/datajoint/datajoint-python">https://github.com/datajoint/datajoint-python</a> |
| Suite2p python | Pachitariu <i>et al.</i> , 2017 | <a href="https://github.com/MouseLand/suite2p">https://github.com/MouseLand/suite2p</a>                   |
| Fiji (ImageJ)  | Schindelin <i>et al.</i> , 2012 | <a href="http://fiji.sc">http://fiji.sc</a> ; RRID: SCR_002285                                            |
